# Supplementary material for: Factors Associated with 90-Day Mortality in Invasively Ventilated Patients with COVID-19 in Marseille, France
Source: MDPI journal article supplement (doi:10.3390/jcm10235650), 2021-11-30
Supplement: s1 [file s1]

|                     | O2 flow (L/min) | Approximated FiO2 (%) |
|---------------------|-----------------|-----------------------|
| Nasal cannula       | 1               | 24                    |
|                     | 2               | 28                    |
|                     | 3               | 32                    |
|                     | 4               | 36                    |
|                     | 5               | 40                    |
|                     | 6               | 44                    |
| Mask                | 5-6             | 40                    |
|                     | 6-7             | 50                    |
|                     | 7-8             | 60                    |
| Mask with reservoir | 6               | 60                    |
|                     | 7               | 70                    |
|                     | 8               | 80                    |
|                     | 9               | 90                    |
|                     | 10              | 95                    |

**Figure S1.** FiO2 estimation based on O2 flow (L/min) (conversion table from the Extended Prevalence of Infection in Intensive Care (EPIC II) study [1]).

1. The RECOVERY Collaborative Group. Dexamethasone in Hospitalized Patients with Covid-19—Preliminary Report. *N. Engl. J. Med.* **2021**, 384, 693–704, doi:10.1056/NEJMoa2021436.

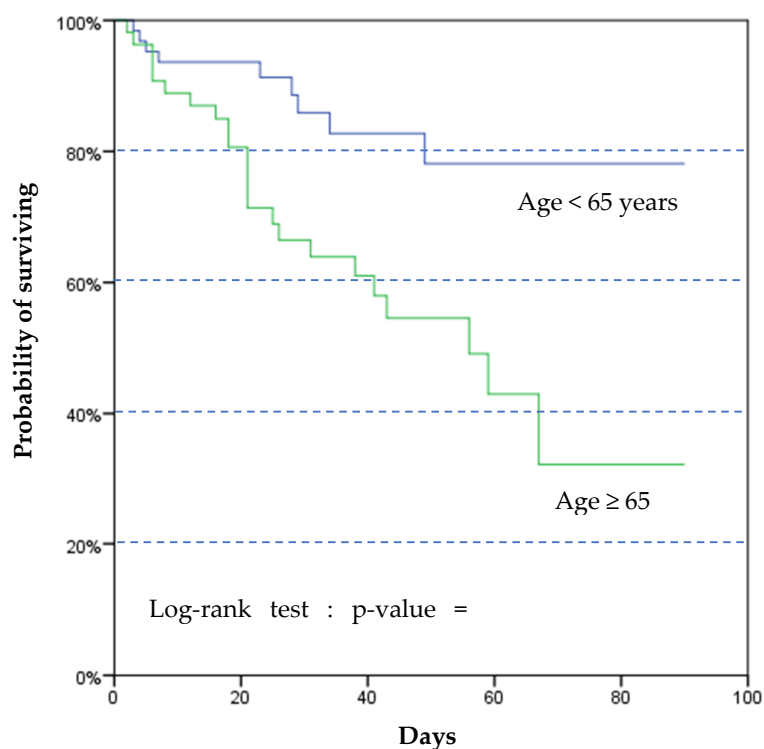

|                    |    |    |    |    |    |
|--------------------|----|----|----|----|----|
| <b>No. at risk</b> |    |    |    |    |    |
| Age < 65 y         | 63 | 59 | 55 | 54 | 54 |
| Age ≥ 65 y         | 54 | 44 | 36 | 32 | 31 |

**Figure S2.** Kaplan-Meier analysis of survival during the 90 days following ICU admission, according to age categories (<65 or ≥ 65 years).

**Table S1.** Complete data, including characteristics, management and outcomes, of the 172 patients according to their 90-day survival status.

|                                             | Total<br>(N=172) | Survivors<br>(N=135) | Non-survivors<br>(N=37) | p-value |
|---------------------------------------------|------------------|----------------------|-------------------------|---------|
| Baseline characteristics                    |                  |                      |                         |         |
| Age                                         | 63(55-71.25)     | 61(53-68)            | 72(63-78)               | < 0.001 |
| Male                                        | 126(73.3)        | 100(74.1)            | 26(70.3)                | 0.643   |
| ABO blood group                             |                  |                      |                         |         |
| A                                           | 54(31.3)         | 44(32.6)             | 10(27)                  | 0.471   |
| B                                           | 24(20)           | 20(14.8)             | 4(10.8)                 | 0.514   |
| O                                           | 54(31.3)         | 40(29.6)             | 14(37.8)                | 0.322   |
| AB                                          | 2(1.2)           | 1(0.7)               | 1(2.7)                  | 0.326   |
| BMI > 25 kg.m <sup>2</sup>                  | 95(55.2)         | 80(59.3)             | 15(40.5)                | 0.042   |
| Hypertension                                | 92(53.5)         | 70(51.9)             | 22(59.5)                | 0.411   |
| Coronaryopathy                              | 14(8.1)          | 7(5.2)               | 7(18.9)                 | 0.007   |
| Chronic heart failure                       | 5(2.9)           | 3(2.2)               | 2(5.4)                  | 0.307   |
| Diabetes                                    | 55(32)           | 41(30.4)             | 14(37.8)                | 0.388   |
| Metabolic syndrome                          | 43(25)           | 32(23.7)             | 11(29.7)                | 0.453   |
| Chronic respiratory disease                 | 29(16.9)         | 19(14.1)             | 10(27)                  | 0.062   |
| Chronic kidney disease                      | 13(7.6)          | 9(6.7)               | 4(10.8)                 | 0.398   |
| Hepatic cirrhosis                           | 3(1.7)           | 2(1.5)               | 1(2.7)                  | 0.615   |
| Neurodegenerative disease                   | 4(2.3)           | 3(2.2)               | 1(2.7)                  | 0.864   |
| Active cancer                               | 22(12.8)         | 15(11.1)             | 7(18.9)                 | 0.208   |
| Immunodeficiency                            | 35(20.3)         | 23(17)               | 12(32.4)                | 0.04    |
| Smoker (> 20 pack-years)                    | 53(30.8)         | 42(31.1)             | 11(29.7)                | 0.872   |
| Statins intake                              | 32(18.6)         | 20(14.8)             | 12(32.4)                | 0.015   |
| ACE inhibitor                               | 25(14.6)         | 16(11.9)             | 9(24.3)                 | 0.059   |
| Angiotensin receptor blockers               | 32(18.7)         | 25(18.7)             | 7(18.9)                 | 0.971   |
| Beta blockers                               | 24(14)           | 19(14.2)             | 5(13.5)                 | 0.918   |
| Anticoagulants                              | 7(4.1)           | 6(4.4)               | 1(2.7)                  | 0.635   |
| Systemic steroids intake                    | 11(6.4)          | 6(4.4)               | 5(13.5)                 | 0.046   |
| Charlson index                              | 3(1-4)           | 2(1-4)               | 4(3-5)                  | < 0.001 |
| SAPS II score                               | 30(24-38)        | 28(23.25-34)         | 38(35-44.75)            | < 0.001 |
| SOFA score                                  | 3(2-6)           | 3(2-5)               | 6(3-7)                  | 0.008   |
| NEWS score                                  | 6(4-8)           | 6(4-8)               | 6(4.25-6.75)            | 0.853   |
| APACHE II score                             | 10(7-13)         | 8(7-12)              | 14(11-15)               | 0.001   |
| CURB 65                                     | 2(1-3)           | 1(1-2)               | 3(1.5-3)                | 0.008   |
| MuLBSTA score                               | 10.5(7-13)       | 9(7-13)              | 11(9-13)                | 0.063   |
| Murray score                                | 3(2.5-3.3)       | 3(2-3.15)            | 3(2.7-3.3)              | 0.086   |
| ROX index                                   | 5.5(3.4-9.8)     | 5.9(3.6-10.2)        | 4.6(2.7-6.9)            | 0.045   |
| CT severity visual scoring                  |                  |                      |                         |         |
| Minor                                       | 11(6.4)          | 8(5.9)               | 3(8.1)                  | 0.548   |
| Moderate                                    | 44(25.6)         | 38(28.1)             | 6(16.2)                 | 0.184   |
| Severe                                      | 81(69.2)         | 64(47.4)             | 17(45.9)                | 0.808   |
| Total lungs volume on CT (cm <sup>3</sup> ) | 3233(2463-4095)  | 3065(2396-4003)      | 3743(3261-4158)         | 0.572   |
| Lesions/lungs ratio on CT (%)               |                  |                      |                         |         |
| Ground glass/lungs ratio                    | 21.3(9.9-31.8)   | 20.8(10.3-33.6)      | 21.5(7.2-28.2)          | 0.402   |
| Condensations / lungs ratio                 | 5.2(2.2-10.5)    | 5.6(2.5-11.8)        | 2.9(0.4-8.2)            | 0.05    |

|                                                               |                 |                 |                  |         |
|---------------------------------------------------------------|-----------------|-----------------|------------------|---------|
| All lesions / lungs ratio                                     | 27.2(13.2-41.8) | 27.4(13.7-43.5) | 27.2(9.2-35.4)   | 0.292   |
| Duration between first positive and first negative PCR (days) | 11(6-17)        | 11(5.5-13)      | 11.5(6.25-20.75) | 0.606   |
| Biology (worst value during first 48H after ICU admission)    |                 |                 |                  |         |
| Lymphocyte count (x10 <sup>9</sup> /L)                        | 0.7(0.53-0.99)  | 0.74(0.56-1.1)  | 0.59(0.44-0.78)  | 0.026   |
| Neutrophil to Lymphocyte Ratio                                | 10(6.3-13.8)    | 8.7(5.7-13.1)   | 12.5(10-19.6)    | 0.001   |
| Platelet to Lymphocyte Ratio                                  | 333(248-485)    | 342(228-460)    | 324(263-514)     | 0.737   |
| Monocyte to Lymphocyte Ratio                                  | 0.63(0.44-0.91) | 0.62(0.44-0.91) | 0.68(0.49-0.9)   | 0.77    |
| D-Dimers (mg/L)                                               | 2.45(1.29-4.07) | 2.18(1.24-4)    | 4(1.89-5)        | 0.036   |
| Fibrinogen (g/L)                                              | 7.8(6.7-9.2)    | 7.7(6.7-9)      | 7.9(6.6-9.3)     | 0.807   |
| CRP (mg/L)                                                    | 174(106-275)    | 150(103-241)    | 278(152-324)     | 0.004   |
| Creatinine (μmol/L)                                           | 81(64-118)      | 76(61-107)      | 99(78-152)       | 0.002   |
| Albumin (g/L)                                                 | 33(28.3-36)     | 32.6(28-36)     | 33(30-36)        | 0.513   |
| Troponin                                                      | 16.5(9-32)      | 14(8-27.5)      | 25(15.25-74.25)  | 0.001   |
| LDH (UI/L)                                                    | 434(346-530)    | 415(334-498)    | 535(412-634)     | 0.001   |
| Management in ICU                                             |                 |                 |                  |         |
| Limitation on invasive ventilation                            | 7(4.4)          | 2(1.7)          | 5(13.5)          | 0.002   |
| Use of non-invasive ventilation                               | 26(15.2)        | 21(15.7)        | 5(13.5)          | 0.746   |
| Use of high-flow oxygen                                       | 110(64.3)       | 87(64.9)        | 23(62.2)         | 0.756   |
| Vasopressors                                                  | 106(61.6)       | 74(54.8)        | 32(86.5)         | < 0.001 |
| Inotropic agent                                               | 3(1.7)          | 1(0.7)          | 2(5.4)           | 0.055   |
| Renal replacement therapy                                     | 20(11.6)        | 12(8.9)         | 8(21.6)          | 0.032   |
| Hydroxychloroquine (10 days) + azithromycin (5 days)          | 68(39.5)        | 57(42.2)        | 11(29.7)         | 0.169   |
| Remdesivir                                                    | 0(0)            | 0(0)            | 0(0)             | -       |
| Lopinavir-ritonavir                                           | 20(11.6)        | 15(11.1)        | 5(13.5)          | 0.686   |
| Anakinra                                                      | 21(12.2)        | 18(13.3)        | 3(8.1)           | 0.390   |
| Tocilizumab                                                   | 4(2.3)          | 4(3)            | 0(0)             | 0.289   |
| Ruxolitinib                                                   | 15(8.7)         | 13(9.6)         | 2(5.4)           | 0.42    |
| Complications                                                 |                 |                 |                  |         |
| Bacterial coinfection                                         | 89(51.7)        | 66(48.9)        | 23(62.2)         | 0.152   |
| Septic shock                                                  | 47(27.3)        | 32(23.7)        | 15(40.5)         | 0.043   |
| Venous thrombosis or pulmonary embolism                       | 38(22.1)        | 31(23)          | 7(18.9)          | 0.559   |
| Arterial thrombosis                                           | 10(5.8)         | 4(3)            | 6(16.2)          | 0.002   |
| Severe bleeding event                                         | 25(14.5)        | 17(12.6)        | 8(21.6)          | 0.167   |
| Delirium                                                      | 22(12.8)        | 19(14.1)        | 3(8.1)           | 0.336   |
| Outcomes                                                      |                 |                 |                  |         |
| Length of stay in ICU (days)                                  | 18.5(5.75-39)   | 19(5.5-41.5)    | 18(6-29)         | 0.378   |
| Length of in hospital (days)                                  | 26(13-43.5)     | 29(14-47)       | 21(8-33)         | 0.09    |
| 28-day mortality                                              | 26(15.1)        | 0(0)            | 26(70)           | -       |

**Table S2.** Complete data, including characteristics, management and outcomes, of the 117 patients on invasive mechanical ventilation according to their 90-day survival status.

|                                             | Total<br>(N=117) | Survivors<br>(N=85) | Non-survivors<br>(N=32) | p-value |
|---------------------------------------------|------------------|---------------------|-------------------------|---------|
| Baseline characteristics                    |                  |                     |                         |         |
| Age                                         | 63(56-72)        | 61(54-67)           | 71.5(62.75-77)          | <0.001  |
| Male                                        | 88(75.2)         | 64(75.3)            | 24(75.0)                | 0.974   |
| ABO blood group                             |                  |                     |                         |         |
| A                                           | 42(35.9)         | 32(37.6)            | 10(31.2)                | 0.605   |
| B                                           | 17(14.5)         | 13(15.3)            | 4(12.5)                 | 0.419   |
| O                                           | 41(35)           | 30(35.3)            | 11(34.4)                | 0.366   |
| AB                                          | 2(1.7)           | 1(1.2)              | 1(3.1)                  | 0.218   |
| BMI > 25 kg.m <sup>2</sup>                  | 73 (62.4)        | 59(69.4)            | 14 (43.8)               | 0.011   |
| Hypertension                                | 68(58.1)         | 48(56.5)            | 20(62.5)                | 0.556   |
| Coronopathy                                 | 11(9.4)          | 6(7.1)              | 5(15.6)                 | 0.157   |
| Chronic heart failure                       | 3(2.6)           | 2(2.4)              | 1(3.1)                  | 0.814   |
| Diabetes                                    | 24(20.5)         | 15(17.6)            | 9(28.1)                 | 0.211   |
| Metabolic syndrome                          | 34(29.1)         | 29(34.1)            | 5(15.6)                 | 0.05    |
| Chronic respiratory disease                 | 22(18.8)         | 15(17.6)            | 7(21.9)                 | 0.602   |
| Chronic kidney disease                      | 11(9.4)          | 8(9.4)              | 3(9.4)                  | 0.995   |
| Hepatic cirrhosis                           | 1(0.9)           | 1(1.2)              | 0(0)                    | 0.538   |
| Neurodegenerative disease                   | 1(0.9)           | 1(1.2)              | 0(0)                    | 0.538   |
| Active cancer                               | 15(12.8)         | 10(11.8)            | 5(15.6)                 | 0.578   |
| Immunodeficiency                            | 24(20.5)         | 15(17.6)            | 9(28.1)                 | 0.211   |
| Smoker (> 20 pack-years)                    | 31(26.5%)        | 21(24.7%)           | 10(31.3%)               | 0.475   |
| Statins intake                              | 23(19.7)         | 12(14.1)            | 11(34.4)                | 0.014   |
| ACE inhibitor                               | 22(19)           | 13(15.5)            | 9(28.1)                 | 0.12    |
| Angiotensin receptor blockers               | 20(17.2)         | 15(17.9)            | 5(15.6)                 | 0.776   |
| Beta blockers                               | 19(16.4)         | 14(16.7)            | 5(15.6)                 | 0.892   |
| Anticoagulants                              | 6(5.1)           | 5(5.9)              | 1(3.1)                  | 0.547   |
| Systemic steroids intake                    | 9(7.7)           | 6(7.1)              | 3(9.4)                  | 0.675   |
| Charlson index                              | 3(2-4)           | 2.5(0.8-3.2)        | 4.2(2.6-5.8)            | <0.001  |
| SAPS II score                               | 34(27-40)        | 30.5(25-38.25)      | 38(35-45)               | 0.02    |
| SOFA score                                  | 5(3-7)           | 4(3-7)              | 5(3-6)                  | 0.966   |
| NEWS score                                  | 7(5-8)           | 7(5-8)              | 6(4-7)                  | 0.203   |
| APACHE II score                             | 12(8-15)         | 10(8-13)            | 14(11-15.25)            | 0.003   |
| CURB 65                                     | 2(1-3)           | 2(1-2)              | 3(1.5-3)                | 0.014   |
| MuLBSTA score                               | 11(8-13)         | 11(7.25-13)         | 11(9-13)                | 0.479   |
| Murray score                                | 3(2.7-3.3)       | 3(2.7-3.3)          | 3(2.7-3.3)              | 0.679   |
| ROX index                                   | 4.4(3.1-8.2)     | 4.4(3.3-8.2)        | 4.3(2.7-7.5)            | 0.704   |
| CT severity visual scoring                  |                  |                     |                         |         |
| Minor                                       | 6(5.1)           | 3(3.5)              | 3(9.3)                  | 0.182   |
| Moderate                                    | 26(22.2)         | 20(23.5)            | 6(18.8)                 | 0.613   |
| Severe                                      | 54(46.1)         | 40(47)              | 14(43.8)                | 0.824   |
| Total lungs volume on CT (cm <sup>3</sup> ) | 3257(2447-4016)  | 3142(2285-3804)     | 3742(3275-4158)         | 0.01    |
| Lesions/lungs ratio on CT (%)               |                  |                     |                         |         |
| Ground glass/lungs ratio                    | 24.8(12.6-34.4)  | 26.9(13.6-36.6)     | 21.5(7.1-28.2)          | 0.862   |
| Condensations / lungs ratio                 | 5.1(2.1-12.4)    | 6.6(3.1-16)         | 2.1(0.3-8.2)            | 0.495   |

|                                                               |                 |                  |                  |         |
|---------------------------------------------------------------|-----------------|------------------|------------------|---------|
| All lesions / lungs ratio                                     | 31.8(15.6-46.6) | 34.1(19.9-49.7)  | 26.8(9.2-36.3)   | 0.034   |
| Days from symptoms onset to intubation                        | 9(6-11.25)      | 8.5(6-11)        | 9(6-12)          | 0.3     |
| Days from ICU admission to intubation                         | 0(0-1)          | 1(0-1)           | 0(0-1)           | 0.364   |
| Duration between first positive and first negative PCR (days) | 14(7-18)        | 14(9-18)         | 13(7-21.5)       | 0.892   |
| Biology (worst value during first 48H after ICU admission)    |                 |                  |                  |         |
| Lymphocyte count (x10 <sup>9</sup> /L)                        | 0.69(0.5-0.95)  | 0.7(0.53-1)      | 0.61(0.44-0.78)  | 0.382   |
| Neutrophil to Lymphocyte Ratio                                | 11.1(8.3-15.5)  | 10.6(7.5-15.3)   | 12.6(10.5-19.8)  | 0.005   |
| Platelet to Lymphocyte Ratio                                  | 336(260-506)    | 347(254-500)     | 324(268-508)     | 0.857   |
| Monocyte to Lymphocyte Ratio                                  | 0.73(0.5-1)     | 0.71(0.48-1)     | 0.76(0.51-0.91)  | 0.846   |
| D-Dimers (mg/L)                                               | 3.44(1.64-5)    | 3.34(1.52-5)     | 4(1.84-5)        | 0.9     |
| Fibrinogen (g/L)                                              | 8.1(6.9-9.4)    | 8.1(7.1-9.5)     | 8(6.9-9.4)       | 0.995   |
| CRP (mg/L)                                                    | 201(126-302)    | 179(120-248)     | 283(162-324)     | 0.29    |
| Creatinine (μmol/L)                                           | 85(67-138)      | 84(65-127)       | 98(78-153)       | 0.048   |
| Albumin (g/L)                                                 | 33(28-36)       | 33(27-36)        | 34(31-36)        | 0.148   |
| Troponin                                                      | 21(11.75-36)    | 18(10-32)        | 25(14.5-59)      | 0.045   |
| LDH (UI/L)                                                    | 447(368-535)    | 435(347-491)     | 539(443-635)     | 0.005   |
| Ferritin (ng/mL)                                              | 1418(968-2321)  | 1175(950-1778)   | 2728(2342-6049)  | 0.021   |
| Invasive ventilation parameters during first 24H              |                 |                  |                  |         |
| PaO <sub>2</sub> /FiO <sub>2</sub>                            | 130 (100-180)   | 140(100-180)     | 120(100-160)     | 0.457   |
| Tidal volume (mL)                                             | 420(385-440)    | 410(380-430)     | 420(397.5-450)   | 0.149   |
| PEEP (cmH <sub>2</sub> O)                                     | 12(10.3-14)     | 12(12-14)        | 12(10-15)        | 0.483   |
| Plateau pressure (cmH <sub>2</sub> O)                         | 25(21.7-28.3)   | 23.5 (21.0-28.2) | 26.0 (23.6-28.8) | 0.353   |
| Respiratory compliance (mL/cmH <sub>2</sub> O)                | 33(28.2-45)     | 40(29-46)        | 31(27-40)        | 0.018   |
| Mechanical power (J/min)                                      | 15.6(13.3-19.6) | 15.5(13.5-19.1)  | 15.9(12-19.8)    | 0.836   |
| Management in ICU                                             |                 |                  |                  |         |
| Use of non-invasive ventilation before intubation             | 16(13.7)        | 12(14.1)         | 4(12.5)          | 0.693   |
| Use of high-flow oxygen before intubation                     | 69(59)          | 51(60)           | 18(56.2)         | 0.589   |
| Neuromuscular blockade                                        | 113(96.6)       | 82(96.5)         | 31(96.9)         | 0.923   |
| Prone positioning                                             | 99(84.6)        | 72(84.7)         | 27(84.4)         | 0.965   |
| Nitric oxide                                                  | 42(35.9)        | 28(32.9)         | 14(48.3)         | 0.277   |
| Tracheotomy                                                   | 50(42.7)        | 45(52.9)         | 5(15.6)          | < 0.001 |
| ECMO                                                          | 23(19.7)        | 18(21.2)         | 5(15.6)          | 0.501   |
| Vasopressors                                                  | 105(89.7)       | 74(87.1)         | 31(96.9)         | 0.122   |
| Inotropic agent                                               | 3(2.6)          | 1(1.2)           | 2(6.3)           | 0.122   |
| Renal replacement therapy                                     | 20(17.1)        | 12(14.1)         | 8(25)            | 0.167   |
| Hydroxychloroquine (10 days) + azithromycin (5 days)          | 45(38.5%)       | 36(42.4)         | 9(28.1)          | 0.159   |
| Remdesivir                                                    | 0(0)            | 0(0)             | 0(0)             | -       |
| Lopinavir-ritonavir                                           | 18(15.4)        | 13(15.3)         | 5(15.6)          | 0.965   |
| Anakinra                                                      | 16(13.7)        | 13(15.3)         | 3(9.4)           | 0.406   |
| Tocilizumab                                                   | 3(2.6)          | 3(3.5)           | 0(0)             | 0.282   |
| Ruxolitinib                                                   | 13(11.1)        | 11(12.9)         | 2(6.9)           | 0.305   |
| Complications                                                 |                 |                  |                  |         |
| Ventilator associated pneumonia                               | 71(60.7)        | 53(62.4)         | 18(56.2)         | 0.547   |
| Bacterial coinfection                                         | 86(73.5)        | 64(75.3)         | 22(68.8)         | 0.475   |
| Septic shock                                                  | 47(40.2)        | 32(37.6)         | 15(46.9)         | 0.364   |

|                                         |           |           |                |        |
|-----------------------------------------|-----------|-----------|----------------|--------|
| Venous thrombosis or pulmonary embolism | 35(29.9)  | 29(34.1)  | 6(18.8)        | 0.106  |
| Arterial thrombosis                     | 10(8.5)   | 4(4.7)    | 6(18.8)        | 0.015  |
| Severe bleeding event                   | 25(21.4)  | 17(20)    | 8(25)          | 0.556  |
| Delirium                                | 21(17.9)  | 19(22.4)  | 2(6.3)         | 0.043  |
| Outcomes                                |           |           |                |        |
| Duration of ventilation (days)          | 20(9-33)  | 21(11-34) | 18(6.75-25.25) | 0.06   |
| Ventilator-free days at d28 (days)      | 2(1-7)    | 4(1-7)    | 0(0-1)         | <0.001 |
| Length of stay in ICU (days)            | 29(17-46) | 33(19-53) | 21(6.75-31.75) | 0.02   |
| Length of in hospital (days)            | 37(24-53) | 42(29-57) | 25(8.75-38.25) | <0.001 |
| 28-day mortality                        | 21(17.9)  | 0(0)      | 21(60)         | -      |
